# Supplementary material
Source: MDPI journal article supplement (https://www.mdpi.com/2076-3417/11/8/3545)
Supplement: s1 [file s1]

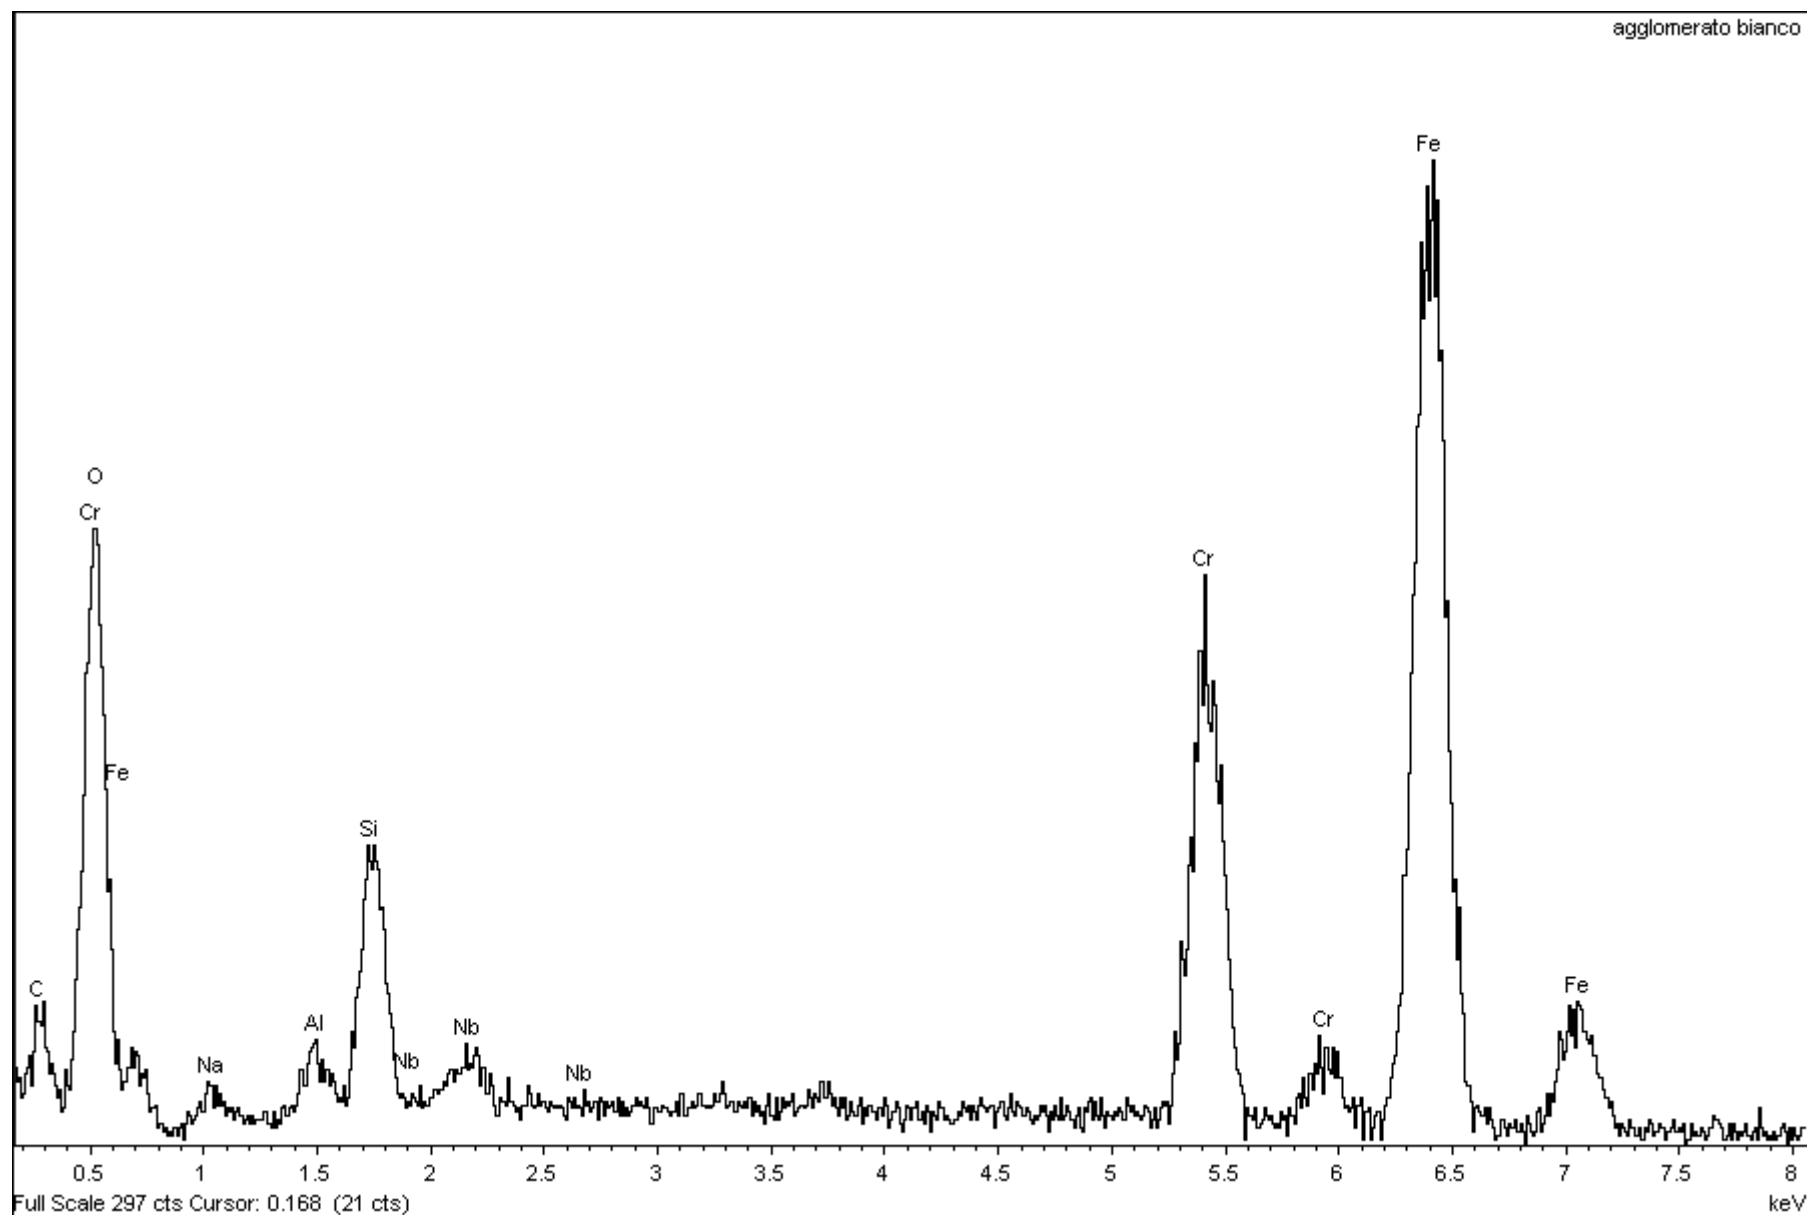

Comment: white agglomerates

## Project 1

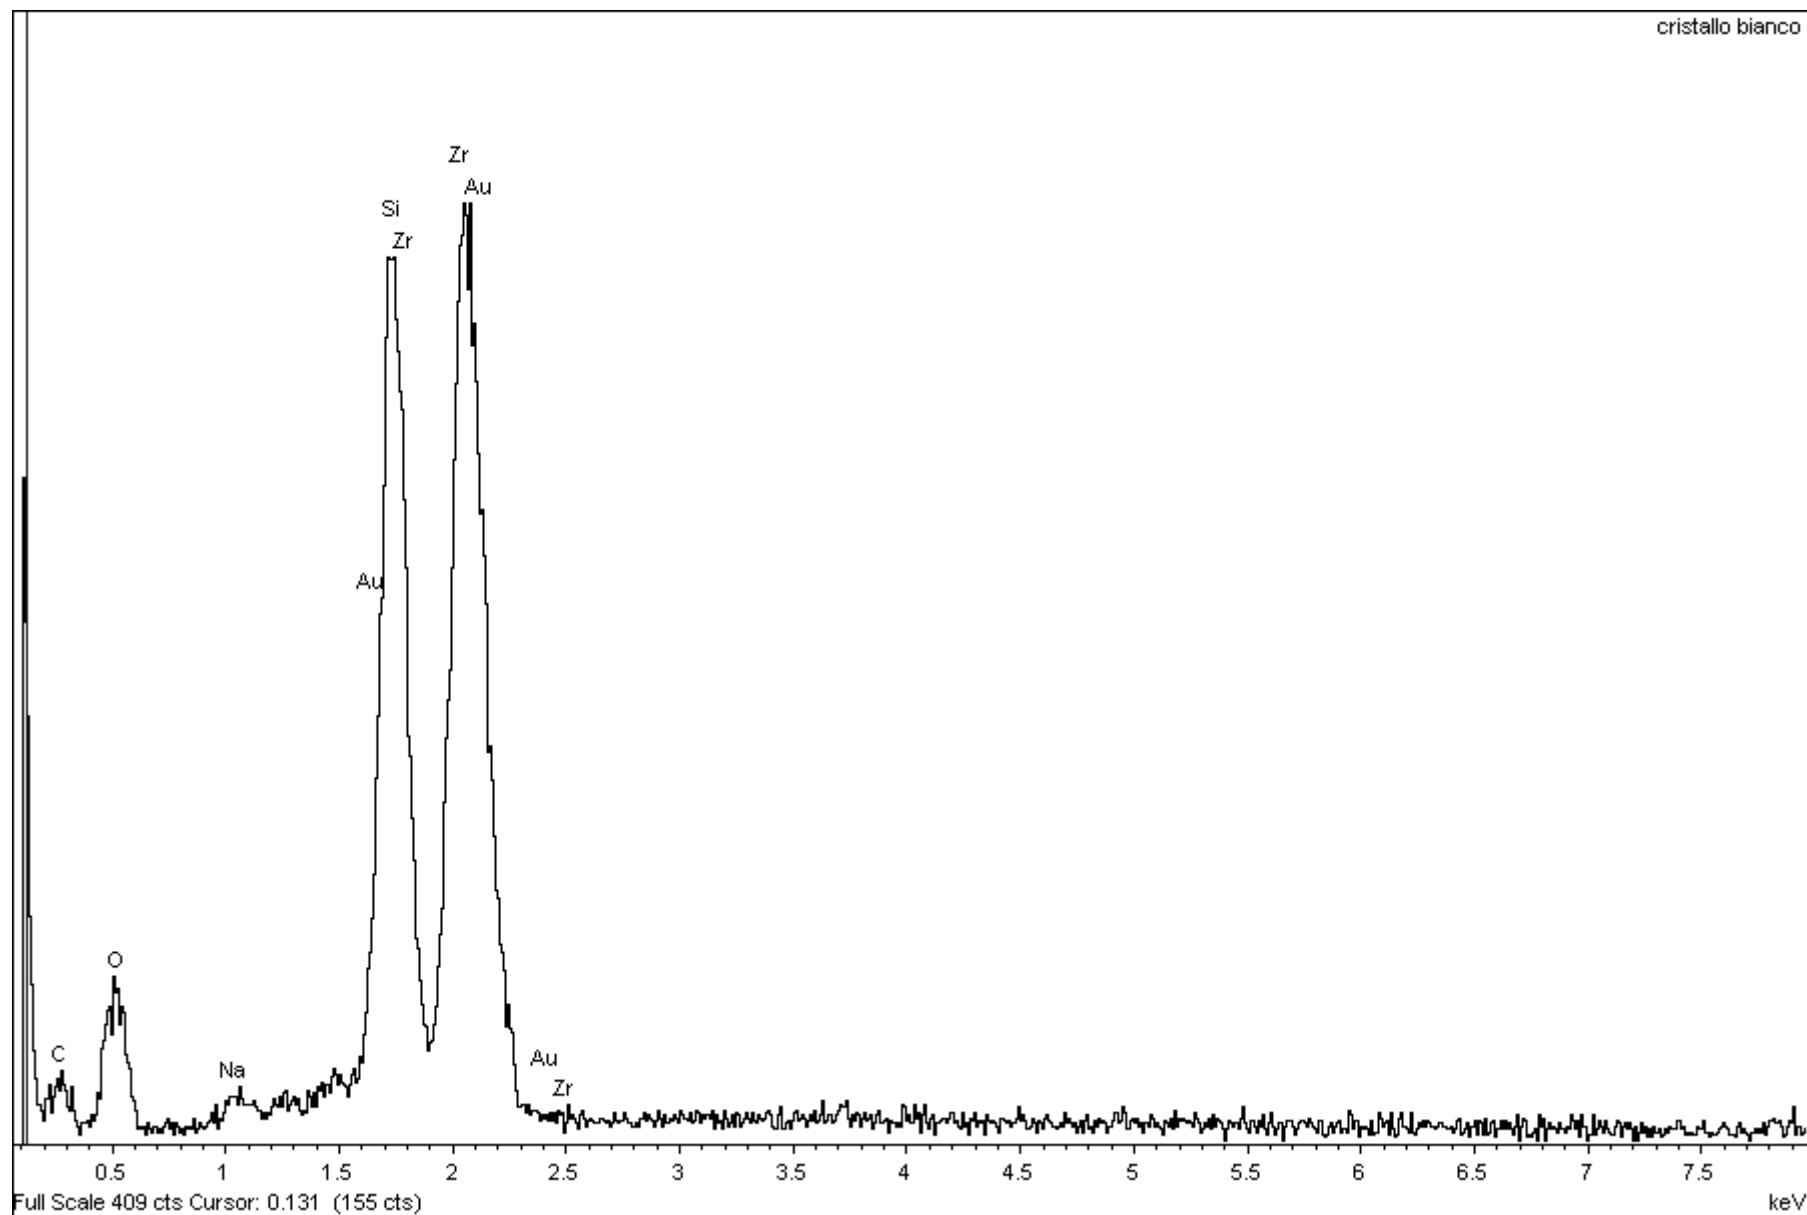

Comment: white crystals

## Project 1

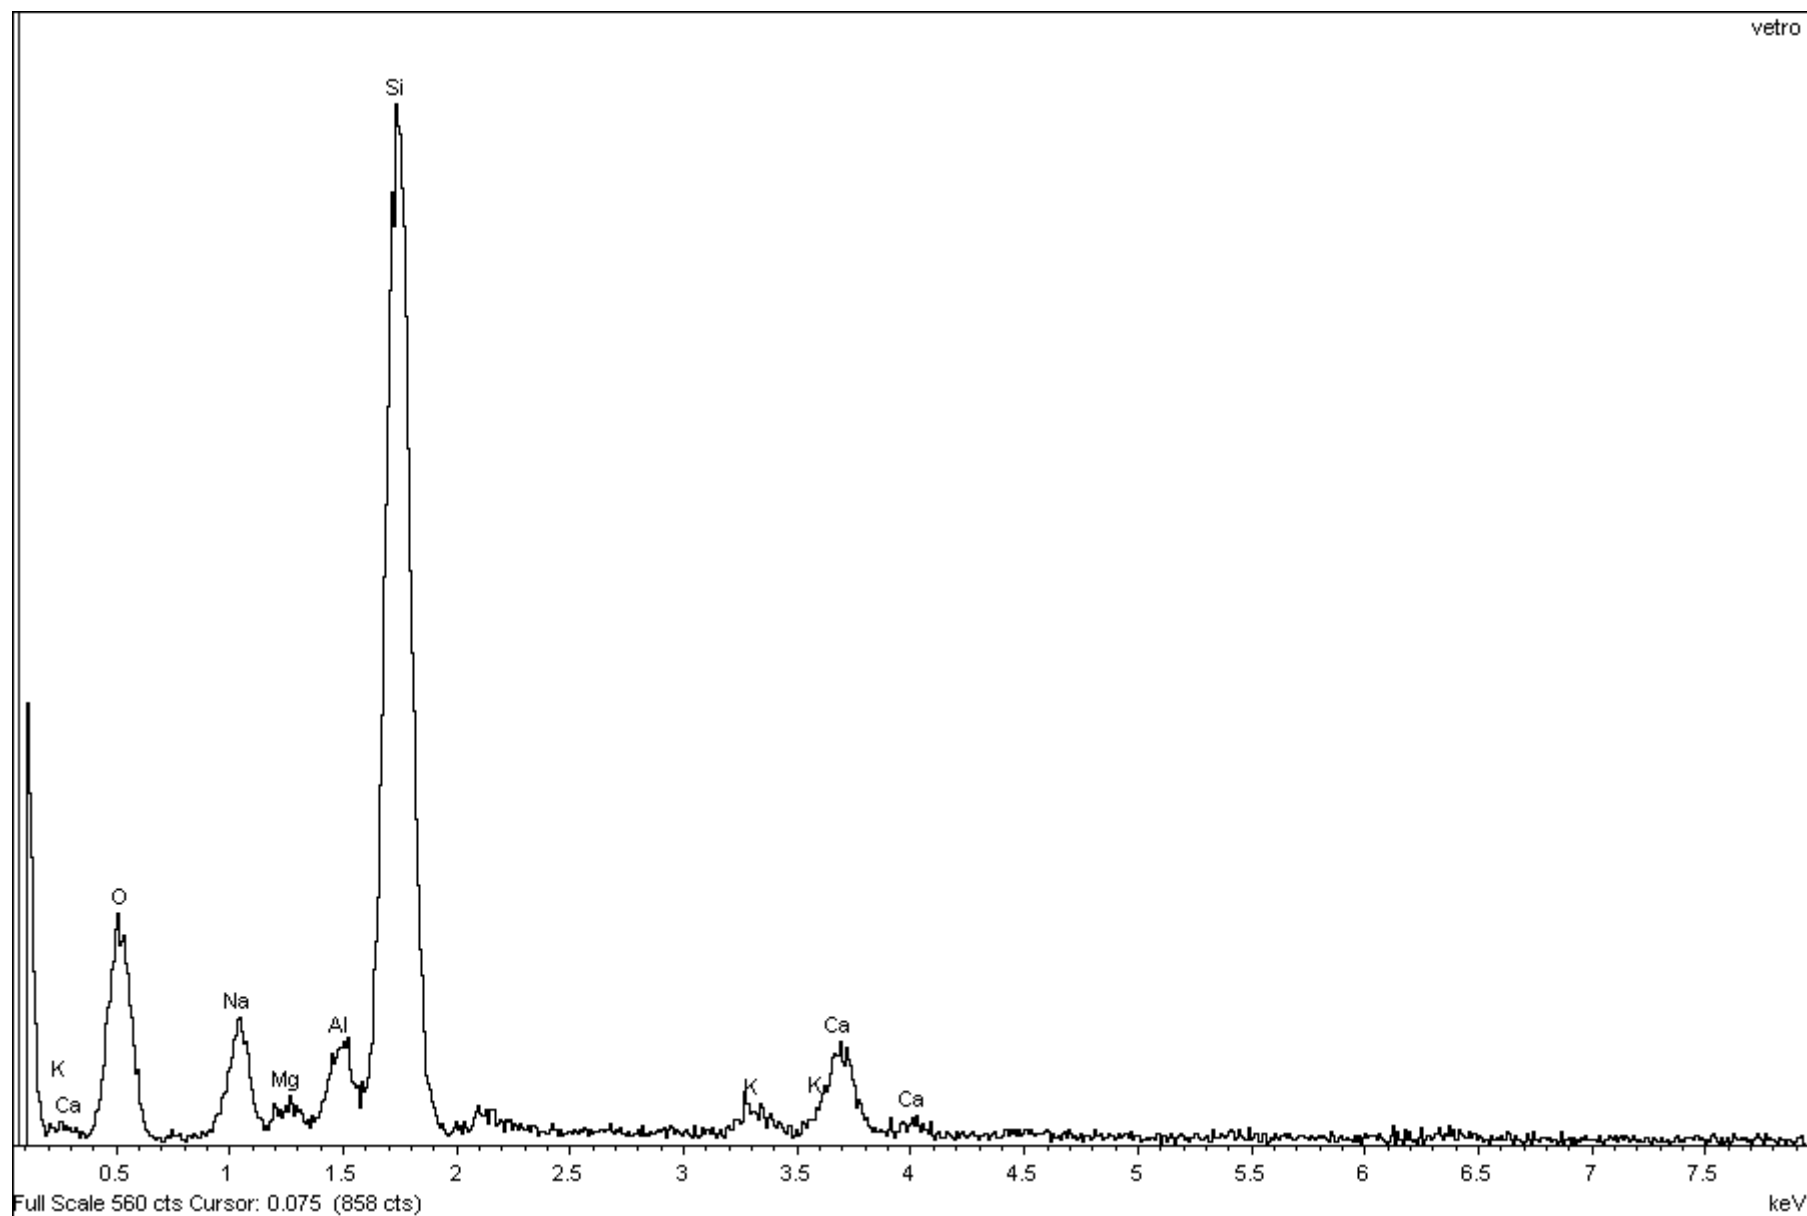

Comment: glassy phase

## Project 1

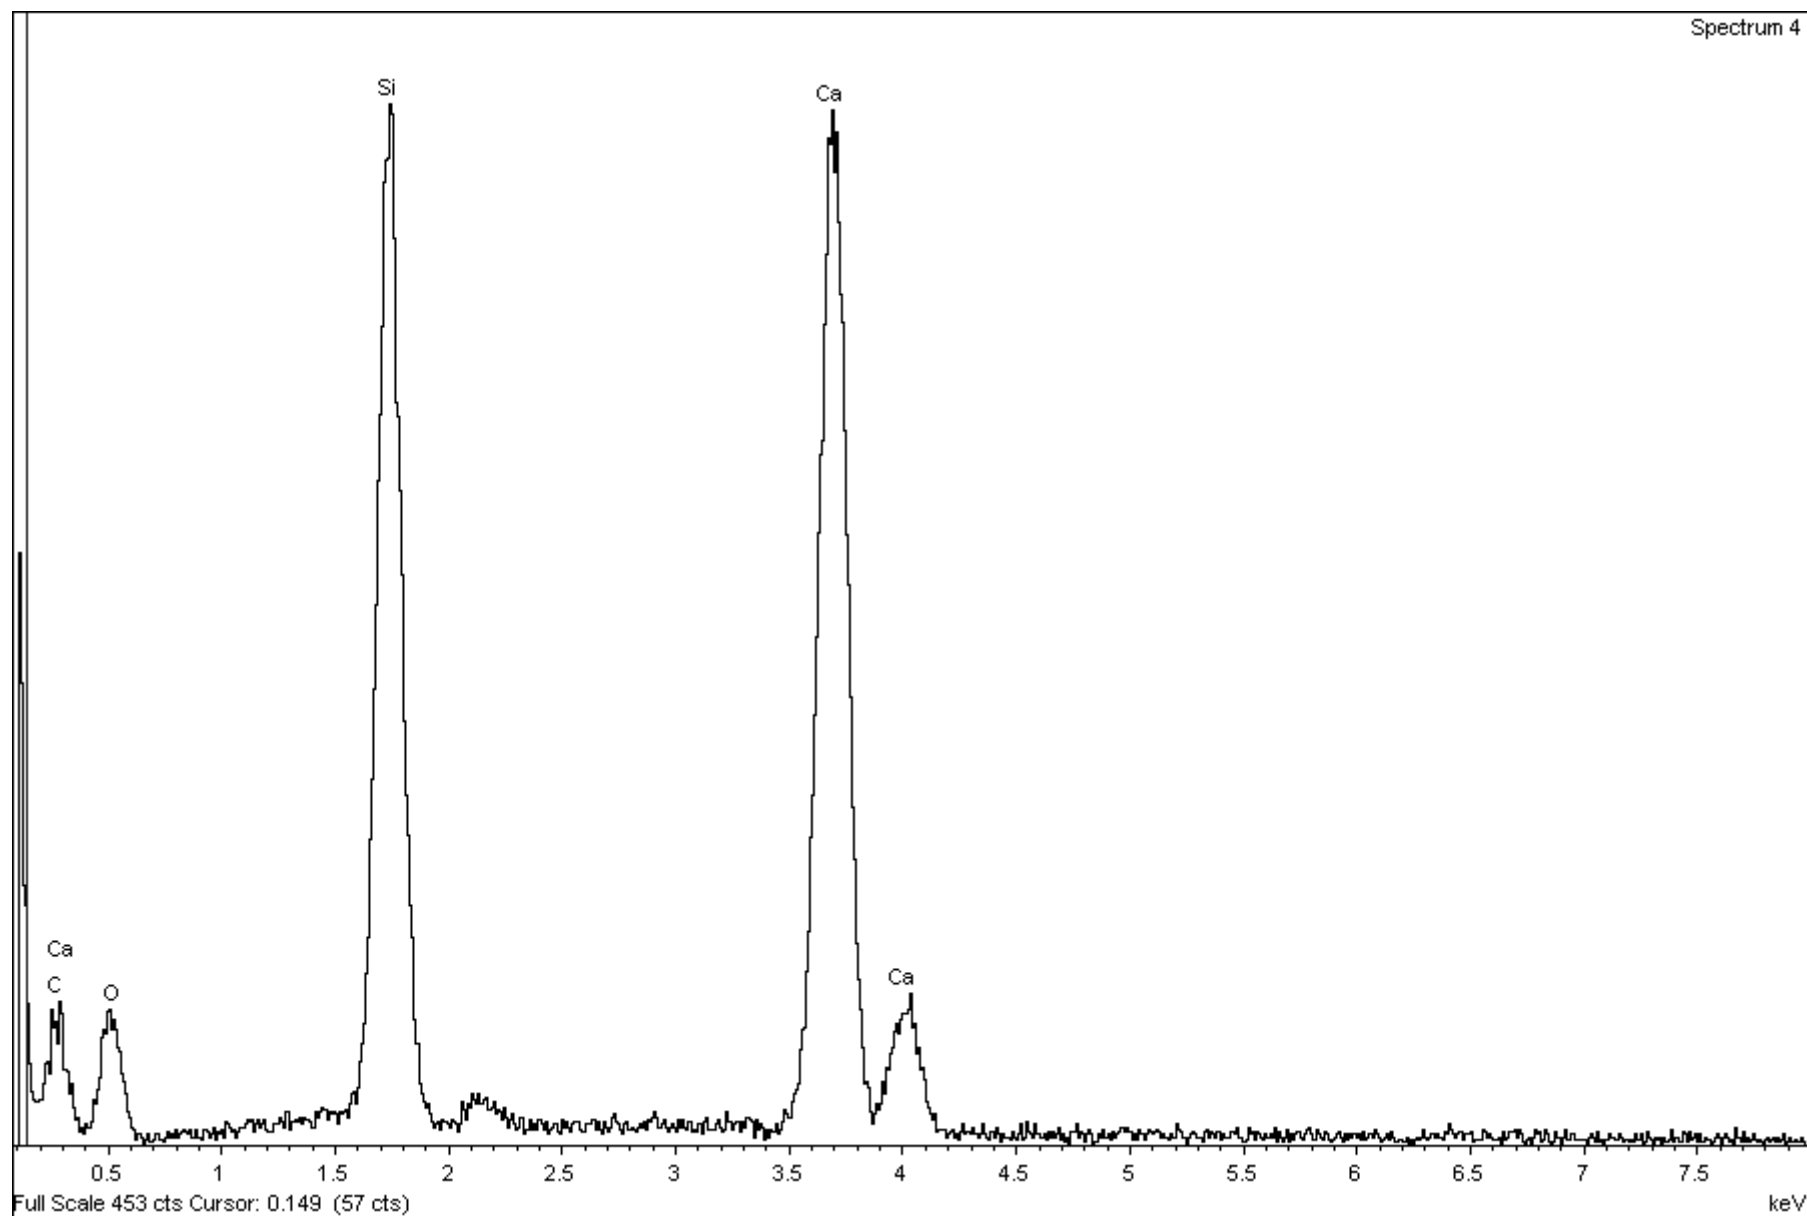

Comment: wollastonite

## Project 1

Spectrum 6

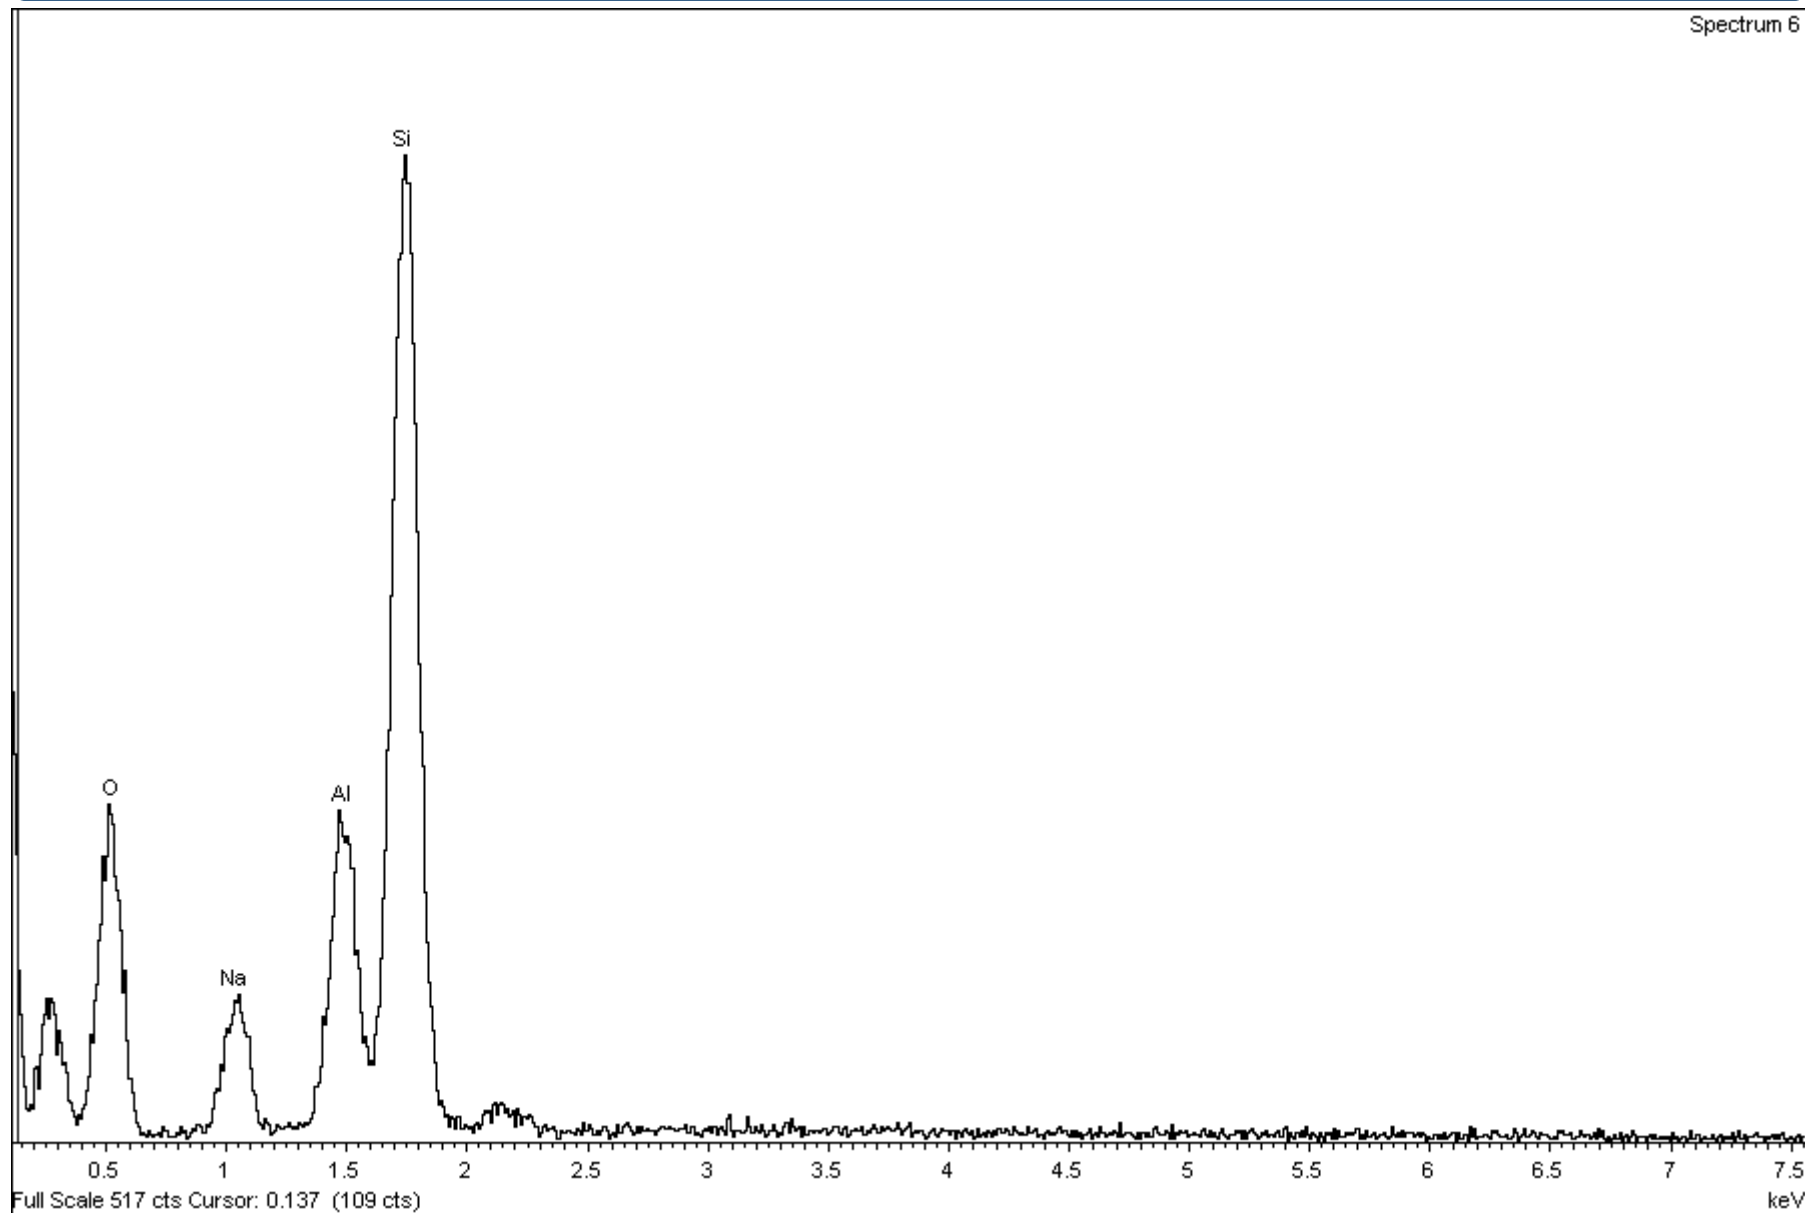

Comment: Albite

## Project 1

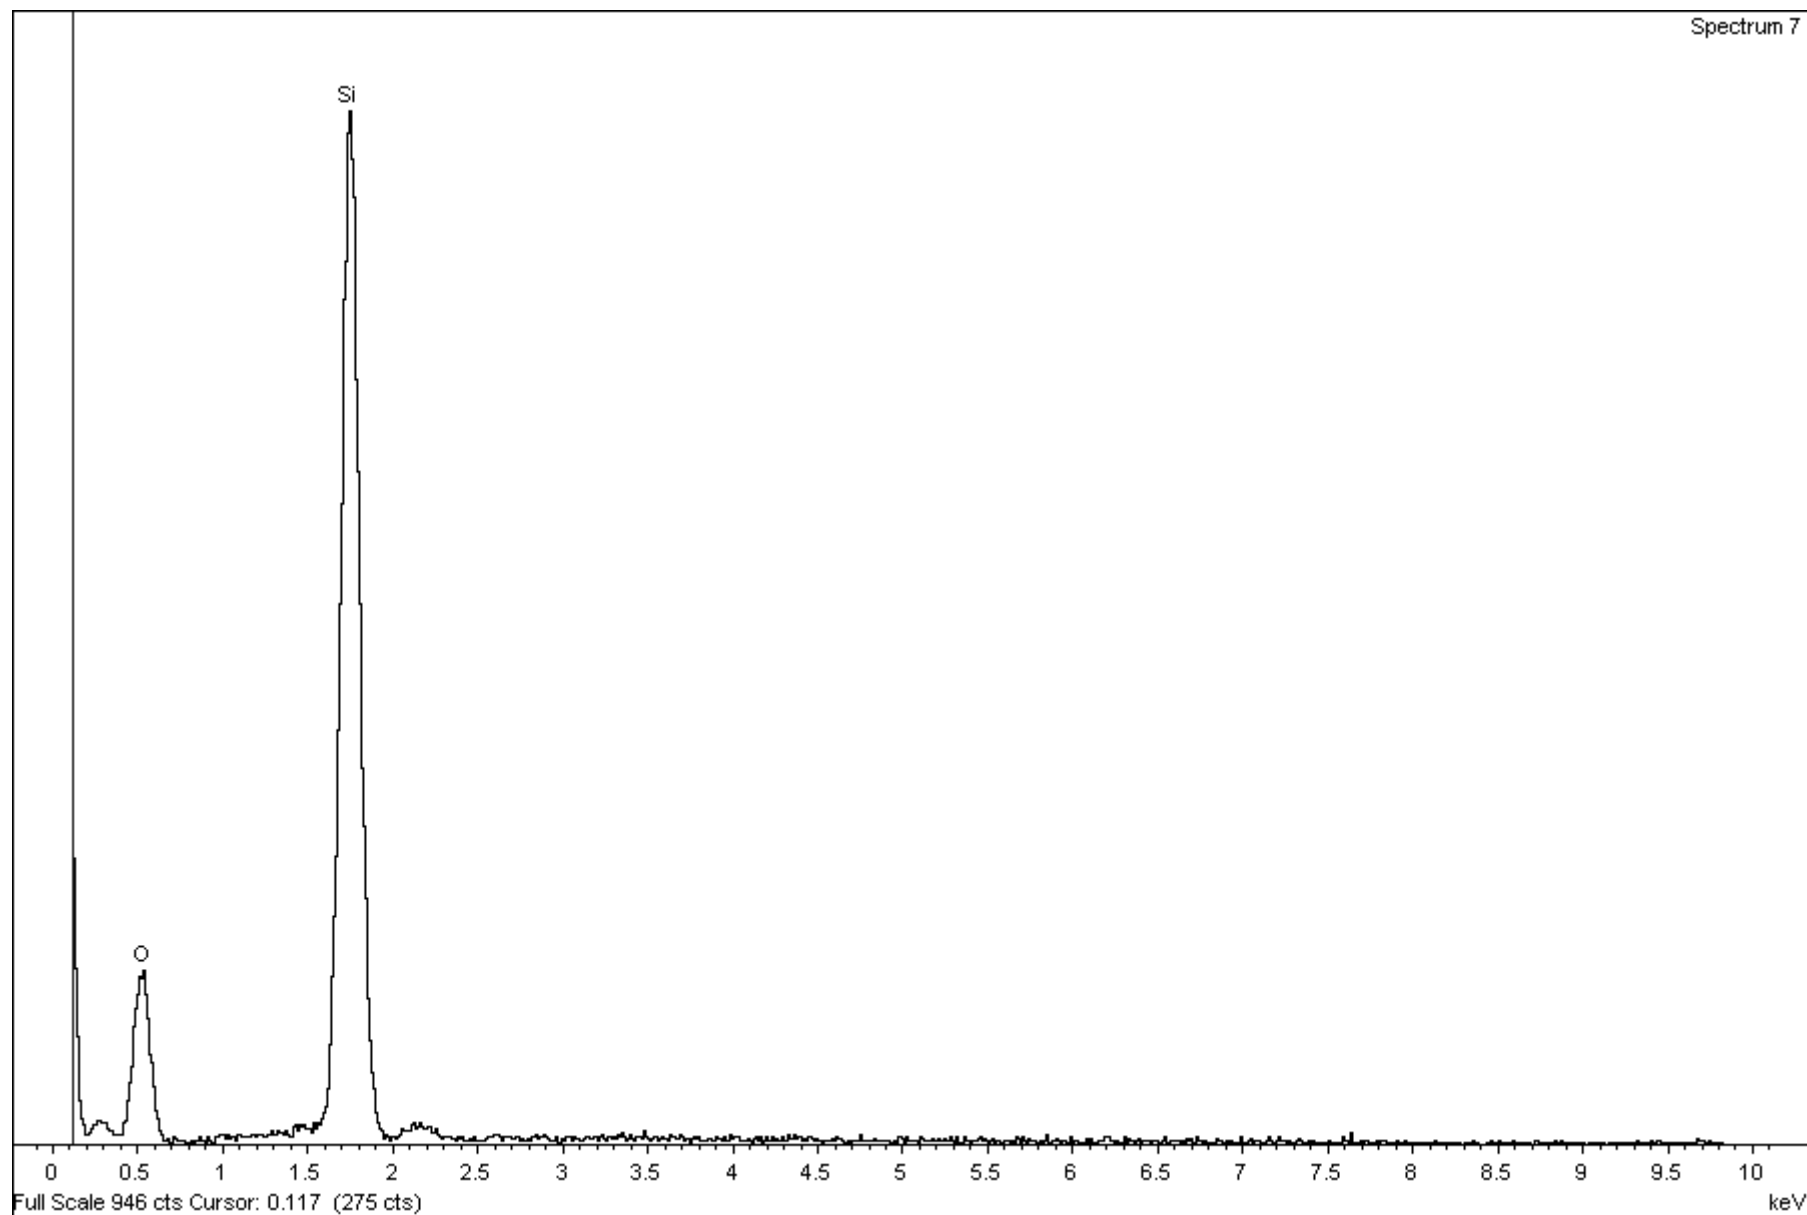

Comment: Quartz
